# Supplementary material for: METTL14-mediated m6A modification of circORC5 suppresses gastric cancer progression by regulating miR-30c-2-3p/AKT1S1 axis
Source: PubMed Central journal article supplement (PMC8842906; doi:10.1186/s12943-022-01521-z), 2022-02-14

**A**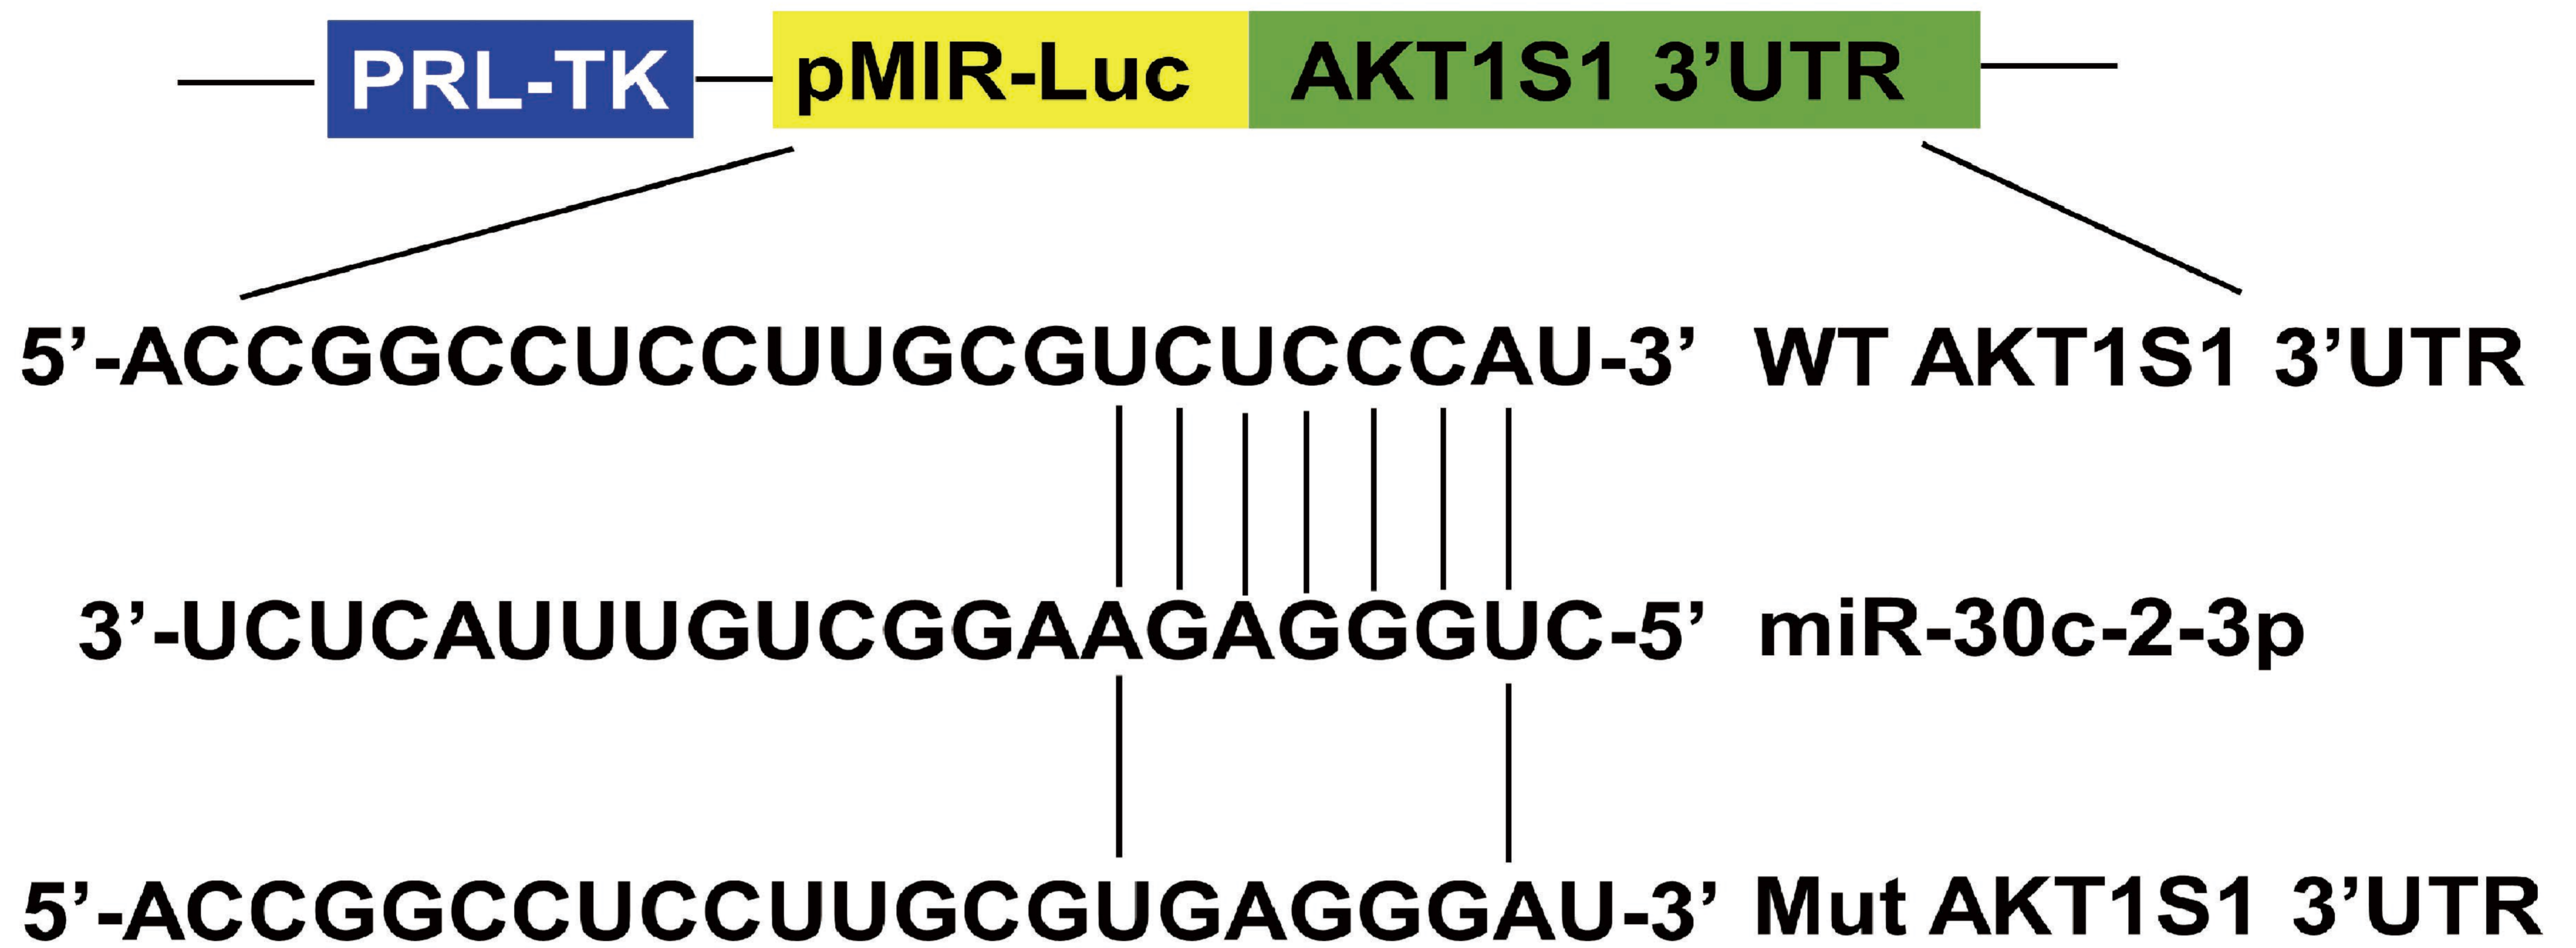**B**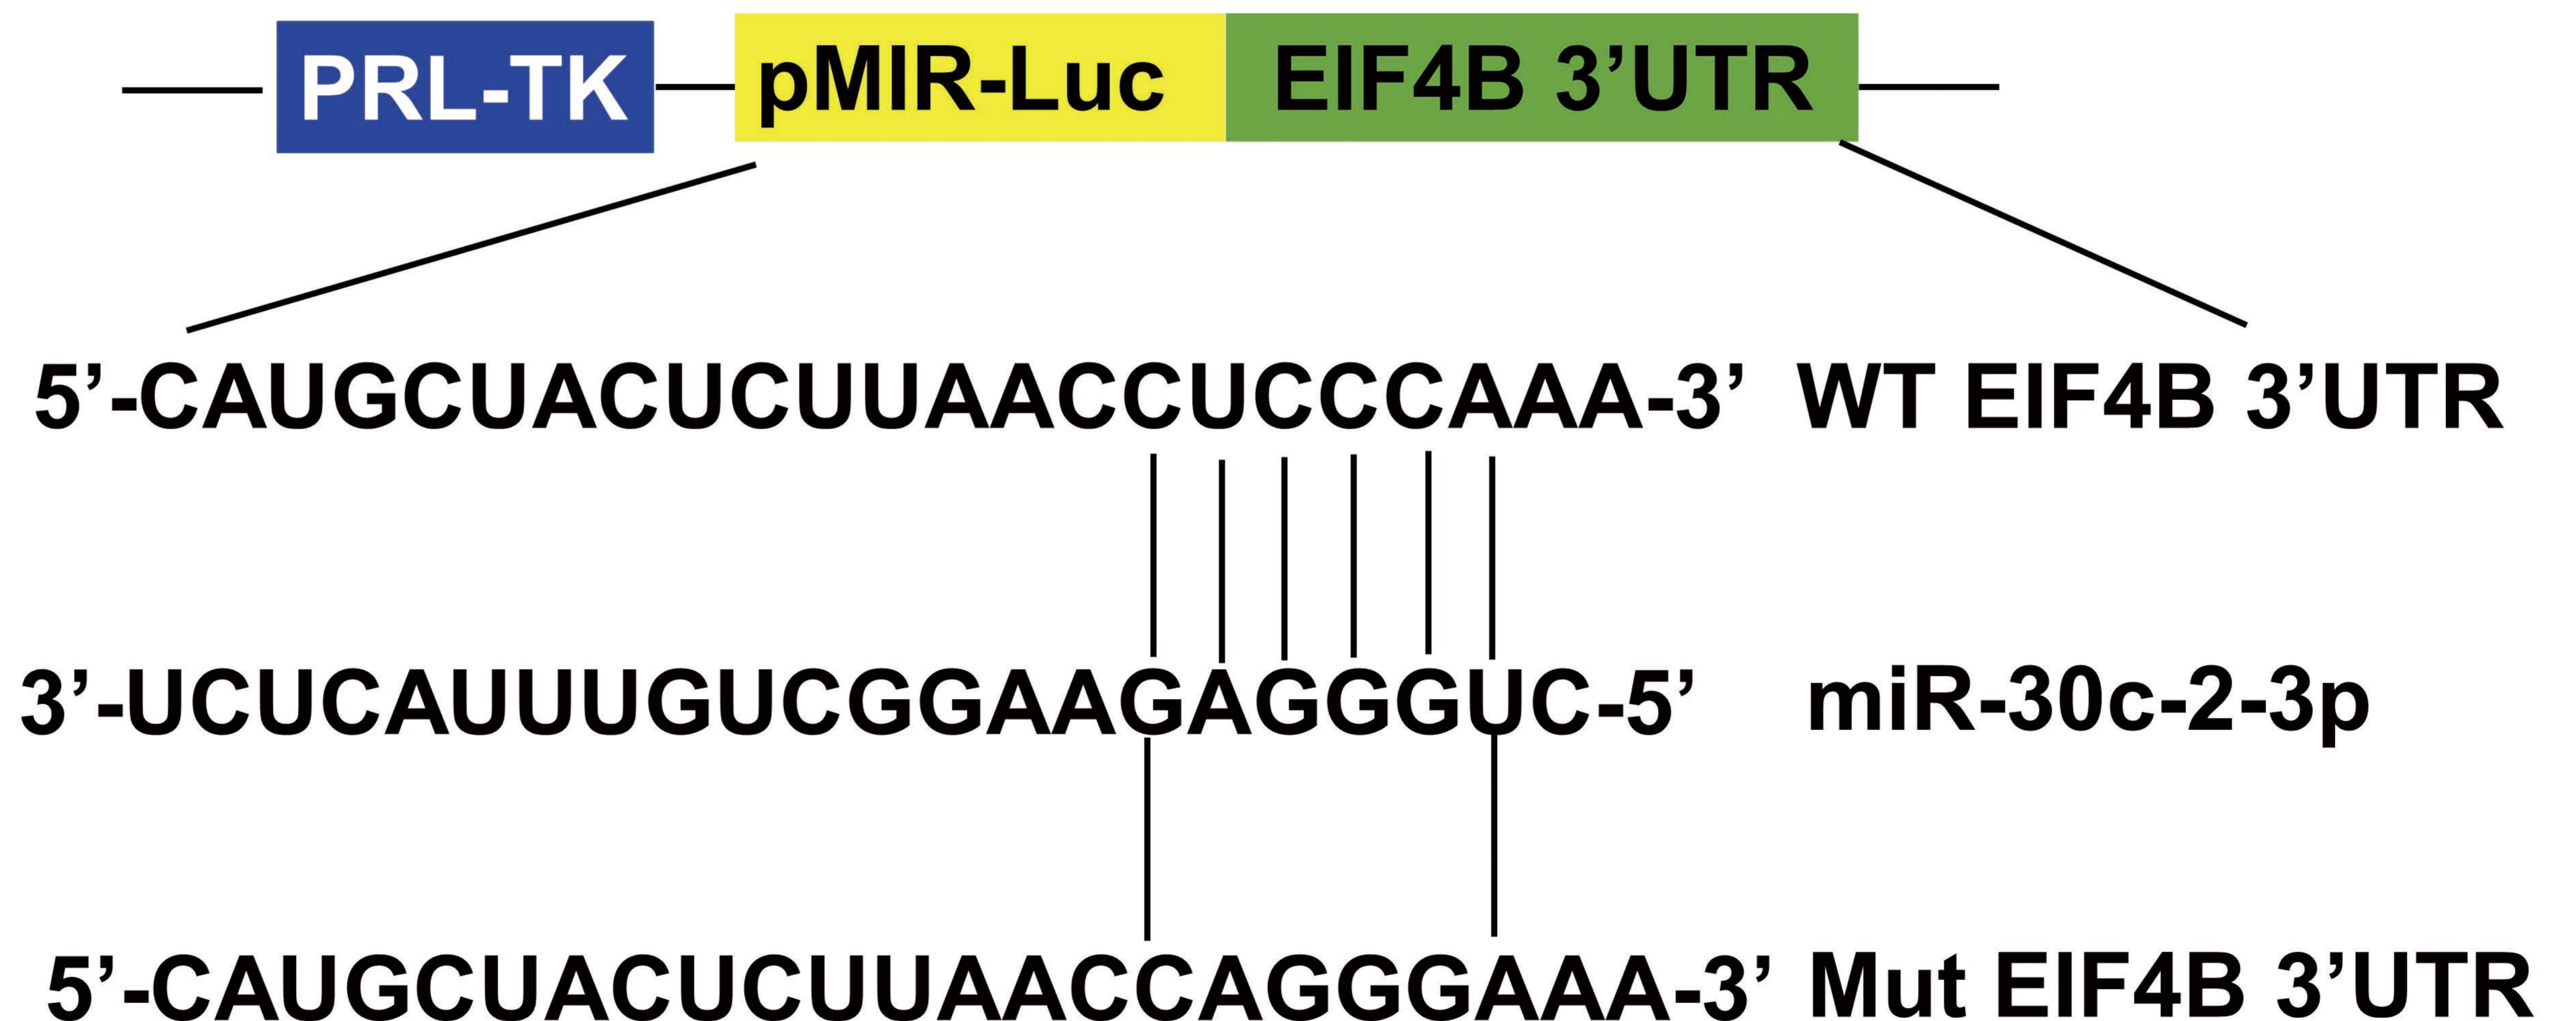

Supplement: 12943_2022_1521_MOESM4_ESM.pdf [file 12943_2022_1521_MOESM4_ESM.pdf]
